# Supplementary material
Source: publisher site journal article supplement (https://www.dovepress.com/article/367147)
Supplement: Supplementary file 1 [file get_supplementary_file.php]

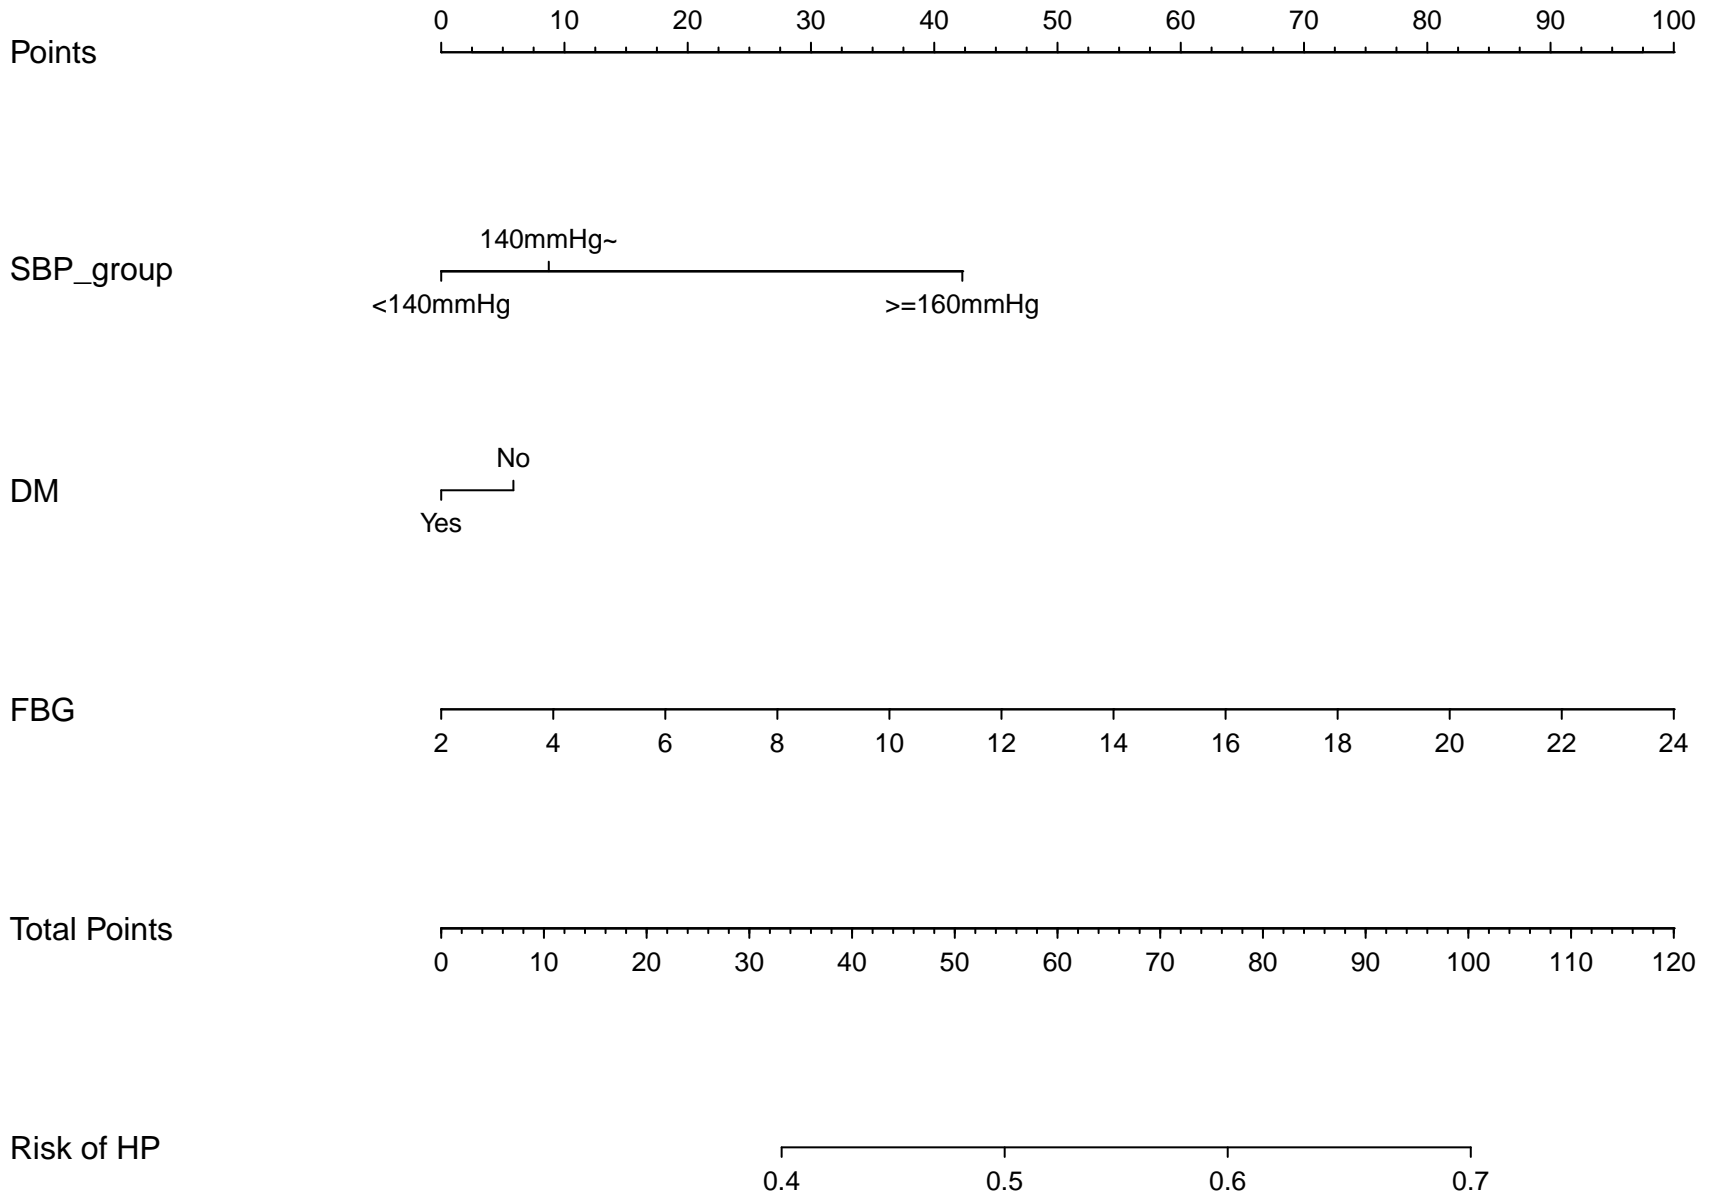

Supplemental Figure 1 shows that 42 points for blood pressure  $\geq 160$  mmHg, 100 points for FBG.

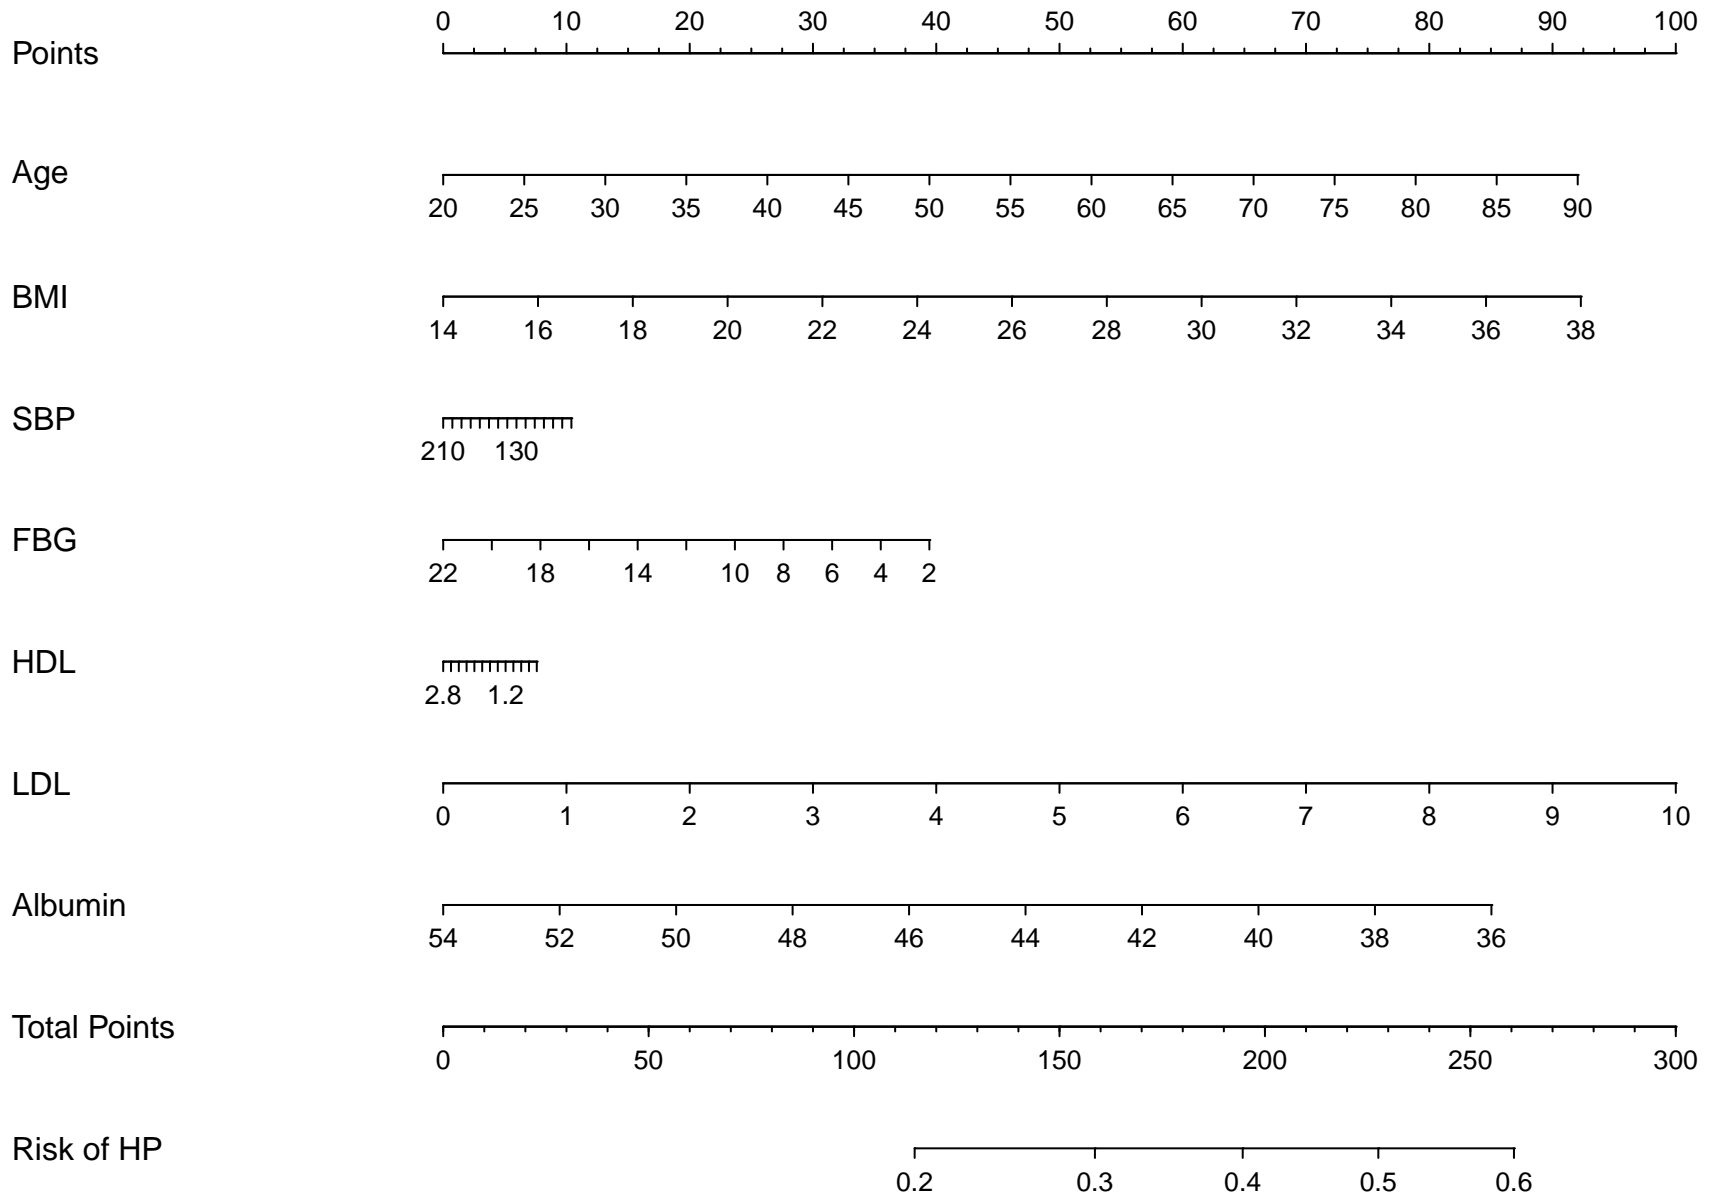

Supplemental Figure 2 shows that 92.5 points for age, 93 points for BMI, and 85 points for albumin.
